# Supplementary material
Source: PubMed Central journal article supplement (PMC6379114)
Supplement: NIHMS989372-supplement-Supp_FigS2.pdf [file NIHMS989372-supplement-Supp_FigS2.pdf]

Figure S2: Definition of medication co-exposure patterns for three hypothetical patients

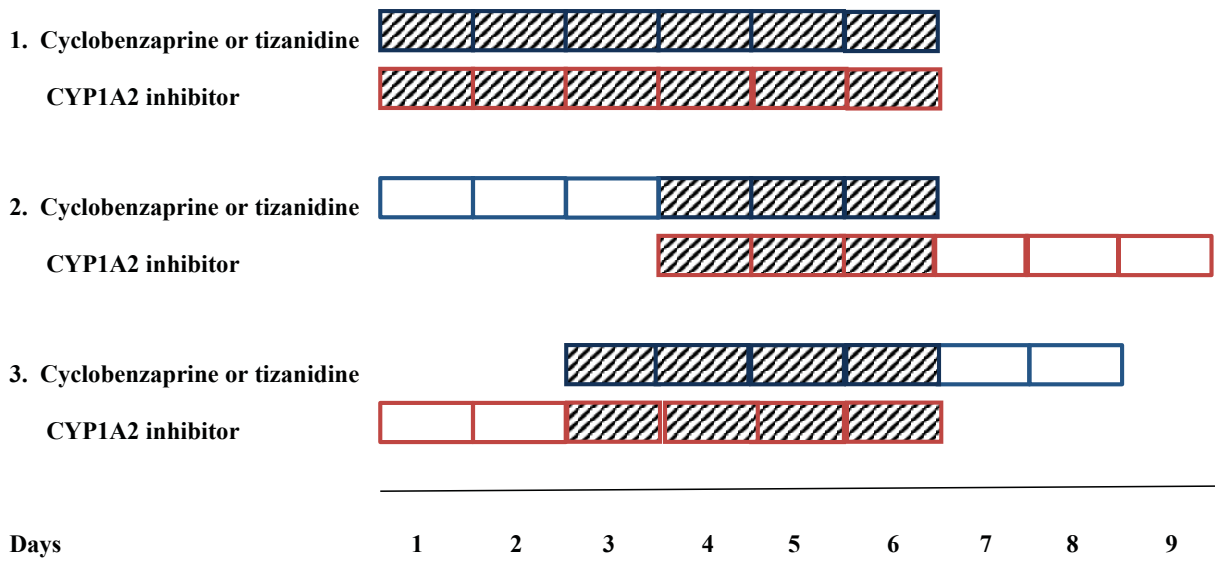

1. Both medications were prescribed on the same day; six days of coexposure window ( $t_0+5$ ); 2. Cyclobenzaprine or tizanidine are prescribed prior to the CYP1A2 inhibitor. 3. CYP1A2 inhibitor is prescribed first.

////// Pattern indicates co-exposure.
