# Supplementary material
Source: PubMed Central journal article supplement (PMC6379114)
Supplement: NIHMS989372-supplement-Supp_TableS1.pdf [file NIHMS989372-supplement-Supp_TableS1.pdf]

**Table S1: ICD9 codes included in the definition of the covariates**

|                                                                                    |                                                                                                    |
|------------------------------------------------------------------------------------|----------------------------------------------------------------------------------------------------|
| Myocardial infarction                                                              | 410.0-410.92,412                                                                                   |
| Congestive heart failure                                                           | 428.0-428.9                                                                                        |
| Peripheral vascular disease                                                        | 443.9, 441.0-441.9,785.4, V43.4                                                                    |
| Cerebrovascular disease                                                            | 430.0-438.9                                                                                        |
| Dementia                                                                           | 290.0-290.9                                                                                        |
| Chronic pulmonary disease                                                          | 490, 491.0-491.9, 492, 492.0, 492.8, 493.0-493.92,494-494.1, 495.0-495.9,496, 500-505, 506.0-506.4 |
| Rheumatic disease                                                                  | 710.0, 710.1, 710.4, 714.0–714.2, 714.81, 725                                                      |
| Peptic ulcer disease                                                               | 531.0-534.91                                                                                       |
| Mild liver disease                                                                 | 571.2, 571.4–571.6                                                                                 |
| Diabetes without chronic complication                                              | 250.0–250.3, 250.7                                                                                 |
| Diabetes with chronic complication                                                 | 250.4–250.6                                                                                        |
| Hemiplegia or paraplegia                                                           | 344.1, 342.0-342.92                                                                                |
| Renal disease                                                                      | 582.0-582.9, 583.0–583.7, 585.1-585.9, 586, 588.0-588.9                                            |
| Any malignancy, including lymphoma and leukemia, except malignant neoplasm of skin | 140.0–172.9, 174.0–195.8, 200.0–208.92                                                             |
| Moderate or severe liver disease                                                   | 456.0–456.21, 572.2–572.8                                                                          |
| Metastatic solid tumor                                                             | 196.0–199.1                                                                                        |
| AIDS/HIV                                                                           | 042                                                                                                |
