# Supplementary material
Source: PubMed Central journal article supplement (PMC6379114)
Supplement: NIHMS989372-supplement-Supp_TableS2.pdf [file NIHMS989372-supplement-Supp_TableS2.pdf]

**Table S2: Anti-hypertensive classes and generic medications**

| <b>Medication Class</b>                 | <b>Medication Names</b>                                                                                                                                                                                                                                                                                                              |
|-----------------------------------------|--------------------------------------------------------------------------------------------------------------------------------------------------------------------------------------------------------------------------------------------------------------------------------------------------------------------------------------|
| Angiotensin converting enzyme inhibitor | fosinopril, fosinopril sodium, ramipril, captopril, moexipril, lisinopril, enalapril, quinapril, trandolapril, benazepril, perindopril, monopril                                                                                                                                                                                     |
| Angiotensin receptor blocker            | eprosartan, azilsartan medoxomil, olmesartan, valsartan, telmisartan, losartan, candesartan, irbesartan                                                                                                                                                                                                                              |
| Alpha-2 agonist                         | clonidine, guanfacine, methyldopa, methyldopate, guanabenz                                                                                                                                                                                                                                                                           |
| Beta-blockers                           | betaxolol, acebutolol, atenolol, metoprolol, metoprolol succinate, metoprolol tartrate, nebivolol, bisoprolol, esmolol, propranolol, nadolol, labetalol, timlol, carteolol, penbutolol, pindolol, blocadren, carvidolol                                                                                                              |
| Calcium channel blockers                | nifedipine, diltiazem, verapamil, isradipine, felodipine, amlodipine, nicardipine, nisoldipine, bepridil, clevidipine                                                                                                                                                                                                                |
| Diuretic                                | bumetanide, ethacrynic acid, ethacrynate, torsemide, furosemide, triamterene, spironolactone, amiloride, furosemide/amiloride, indapamide, chlorthalidone, metolazone, hydrochlorothiazide, methylchlorothiazide, chlorothiazide, bendroflumethiazide, bendrofluazide, polythiazide, hydroflumethiazide, cyclothiazide, benzthiazide |
| Others                                  | aliskiren, hydralazine, minoxidil, hydralazine/isosorbide dinitrate, reserpine, eplerenone, spironolactone, prazosin, prazosin hydrochloride, terazosin, terazosin hydrochloride, doxazosin                                                                                                                                          |
