# Supplementary material
Source: PubMed Central journal article supplement (PMC6379114)
Supplement: NIHMS989372-supplement-Supp_TableS3.pdf [file NIHMS989372-supplement-Supp_TableS3.pdf]

**Table S3: Association between concurrent prescription of tizanidine and a CYP1A2 inhibitor and severe hypotension**

|                                                       | Tizanidine<br>(n=1,077) | Cyclobenzaprine<br>(n=3,376) | p-value |
|-------------------------------------------------------|-------------------------|------------------------------|---------|
| Windows with event (SBP≤70)                           | 20                      | 29                           |         |
| Rate of Event (%)                                     | 1.86                    | 0.86                         | 0.011   |
| Odds Ratio (95% CI)                                   | 2.18 (1.23, 3.88)       | Reference                    | 0.008   |
| Adjusted Odds Ratio – adjusted for age, race, and sex | 2.11 (1.16, 3.83)       | Reference                    | 0.015   |
| Adjusted for logarithmically transformed PS*          | 1.97 (1.08, 3.59)       | Reference                    | 0.027   |

\*PS included the following variables: age, use of ciprofloxacin vs fluvoxamine, race, sex, baseline systolic blood pressure, Charlson score, current use of ARBs, ACE inhibitors, beta-blockers, calcium channel blockers, diuretics, alpha-agonist agents, and other antihypertensive agents.
