# Supplementary material
Source: PubMed Central journal article supplement (PMC6379114)

Figure S1: Flow chart, patient eligibility

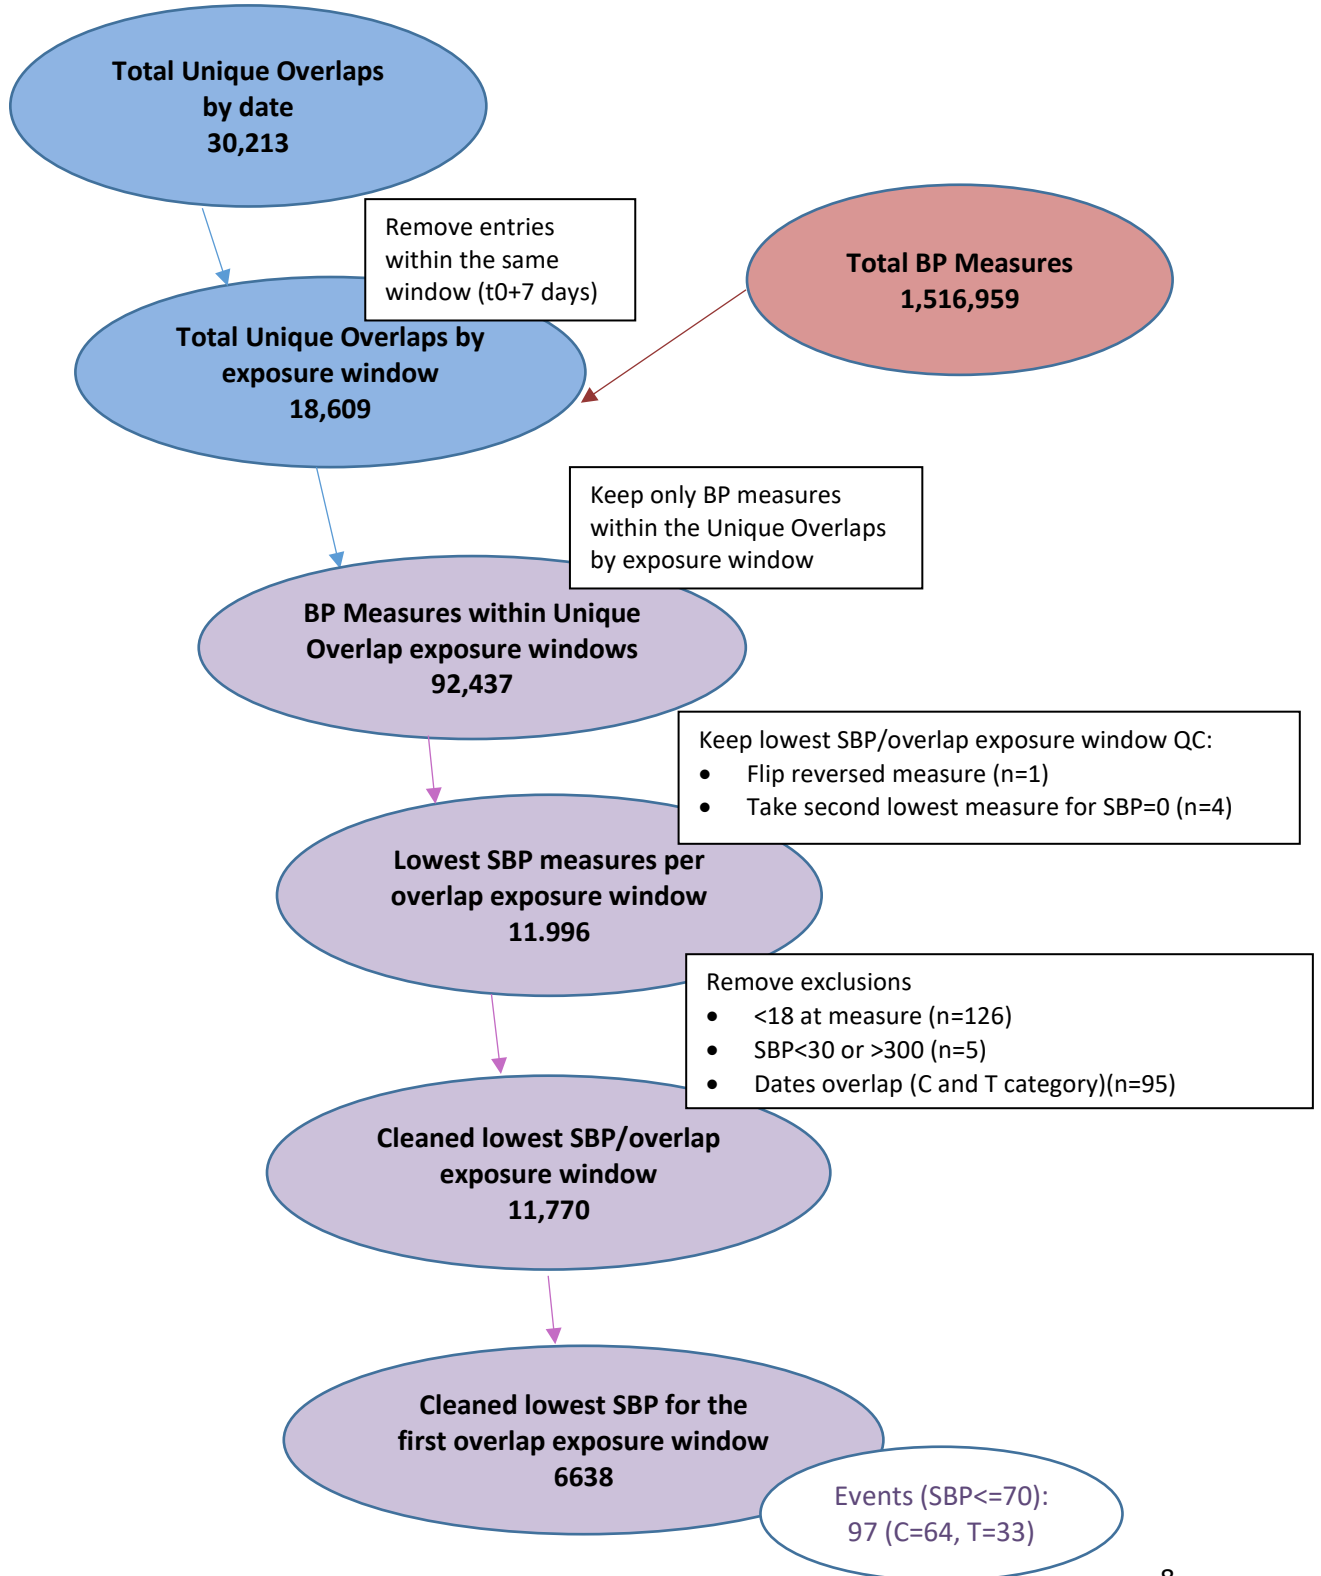

Supplement: NIHMS989372-supplement-Supp_FigS1.pdf [file NIHMS989372-supplement-Supp_FigS1.pdf]
